# Supplementary material for: Deletion of the α subunit of the heterotrimeric Go protein impairs cerebellar cortical development in mice
Source: PubMed Central journal article supplement (PMC6585000; doi:10.1186/s13041-019-0477-9), 2019-06-20
Supplement: 13041_2019_477_MOESM1_ESM.pdf [file 13041_2019_477_MOESM1_ESM.pdf]

## Additional file 1

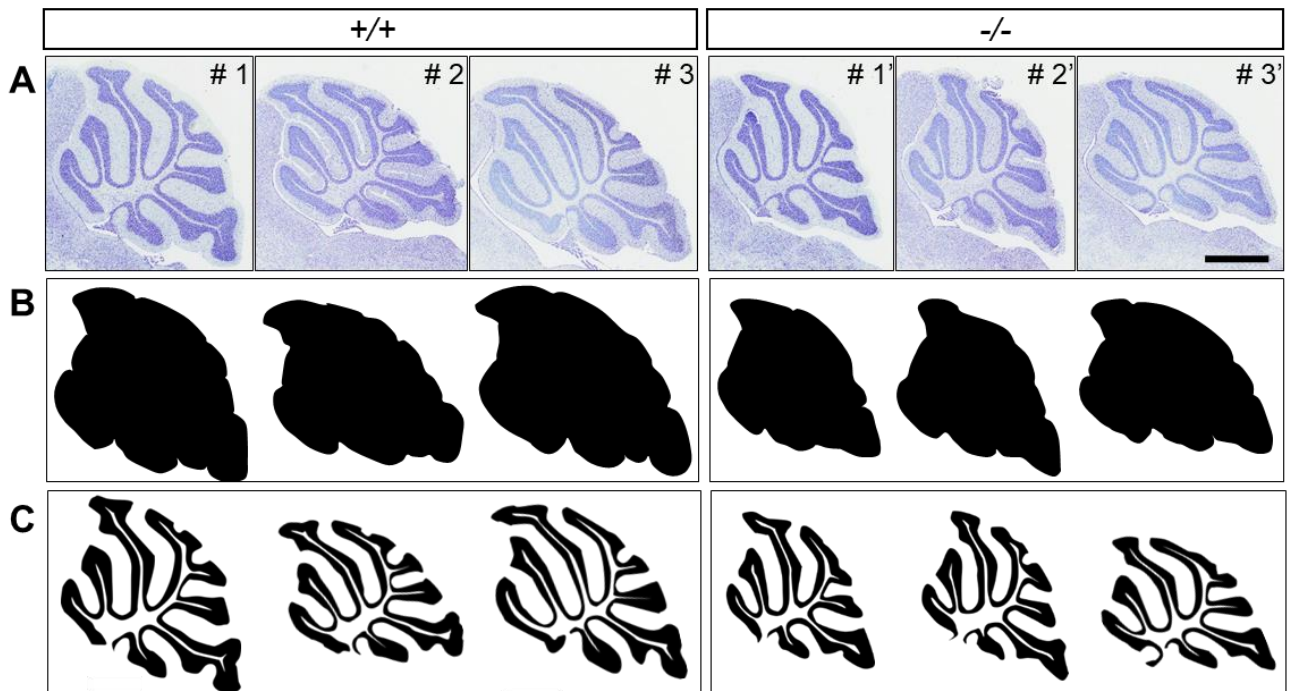

**Additional file 1.** The gross anatomy of the cerebellum is normal in *Gnao*<sup>-/-</sup> mice. (a) Cresyl violet staining of mid-sagittal sections of the cerebellum from *Gnao*<sup>-/-</sup> mice show roughly 25% reductions in size relative to those of *Gnao*<sup>+/+</sup> mice. (b) Total surface area of each sections converted from a and utilized to calculate total area of the middle sagittal sections shown in Fig. 1h. (c) The GCL images extracted from a and utilized to calculate the GCL area shown in Fig. 1j. GCL areas are also detected of smaller size in *Gnao*<sup>-/-</sup> mice. Scale bar, 1 mm.
