# Supplementary material for: Deletion of the α subunit of the heterotrimeric Go protein impairs cerebellar cortical development in mice
Source: PubMed Central journal article supplement (PMC6585000; doi:10.1186/s13041-019-0477-9), 2019-06-20
Supplement: 13041_2019_477_MOESM2_ESM.pdf [file 13041_2019_477_MOESM2_ESM.pdf]

**Additional file 2**

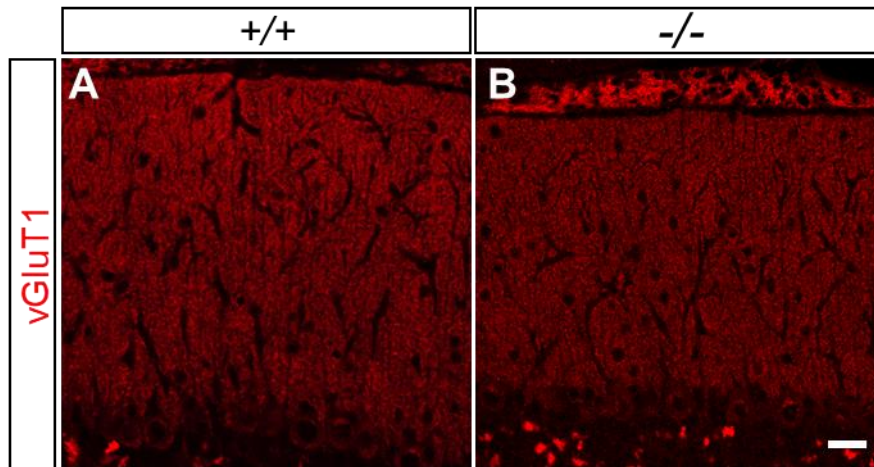

**Additional file 2.** PFs in the ML visualized in vGluT1-stained cerebellum. **(a-b)** *Gnao*<sup>+/+</sup> and *Gnao*<sup>-/-</sup> mice exhibit a similar pattern of vGluT1-positive PFs in the ML of the anterior cerebellar cortex. Scale bar, 20  $\mu$ m.
