# Supplementary material for: Deletion of the α subunit of the heterotrimeric Go protein impairs cerebellar cortical development in mice
Source: PubMed Central journal article supplement (PMC6585000; doi:10.1186/s13041-019-0477-9), 2019-06-20
Supplement: 13041_2019_477_MOESM3_ESM.pdf [file 13041_2019_477_MOESM3_ESM.pdf]

### Additional file 3

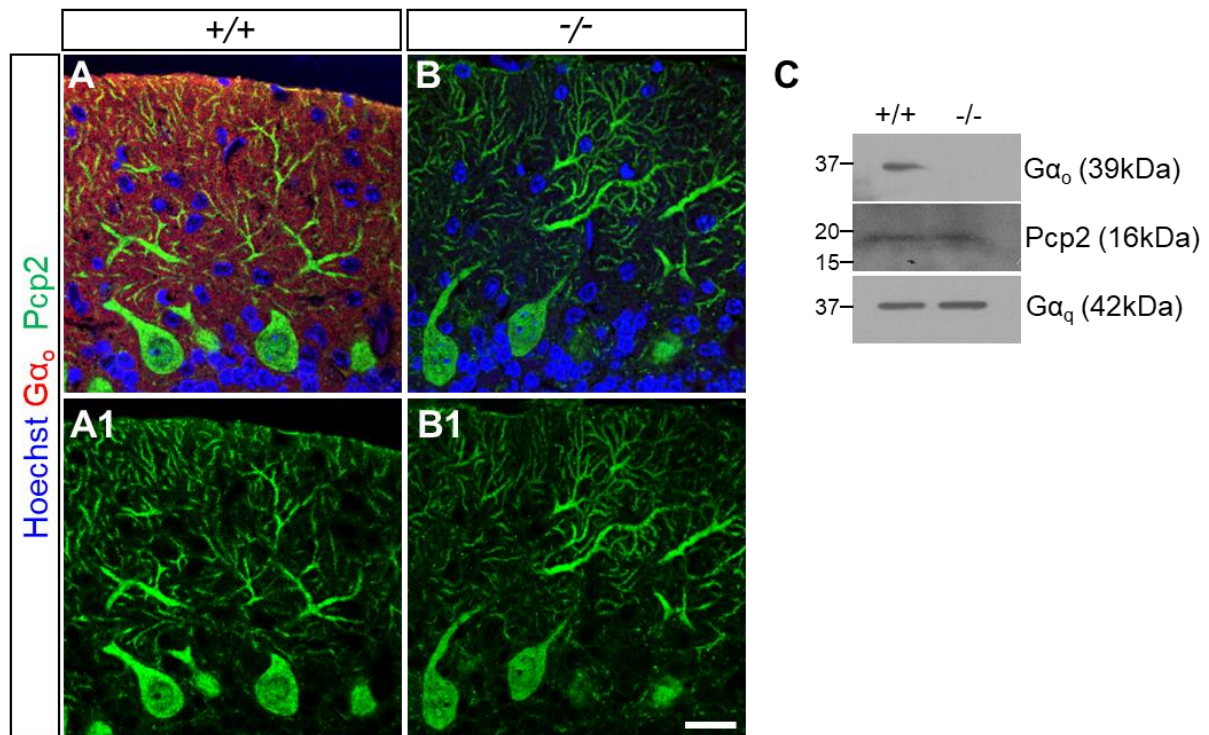

**Additional file 3.** Expression of Pcp2 in the cerebellum of *Gnao*<sup>-/-</sup> mice. (a-b) Immunohistochemistry indicate the loss of Gα<sub>o</sub> in *Gnao*<sup>-/-</sup> mice in b. In the same mice, Pcp2-positive signals in PCL and ML were not altered compared to the wild type littermates (compare a1 and b1). Scale bar, 20 μm. (c) Western blot analysis shows no changes of Pcp2 and Gα<sub>q</sub> in cerebellum of *Gnao*<sup>-/-</sup> mice compared to the wild type littermates.
